# Supplementary material
Source: PubMed Central journal article supplement (PMC2631286)
Supplement: JCI0932354sd.pdf [file JCI0932354sd.pdf]

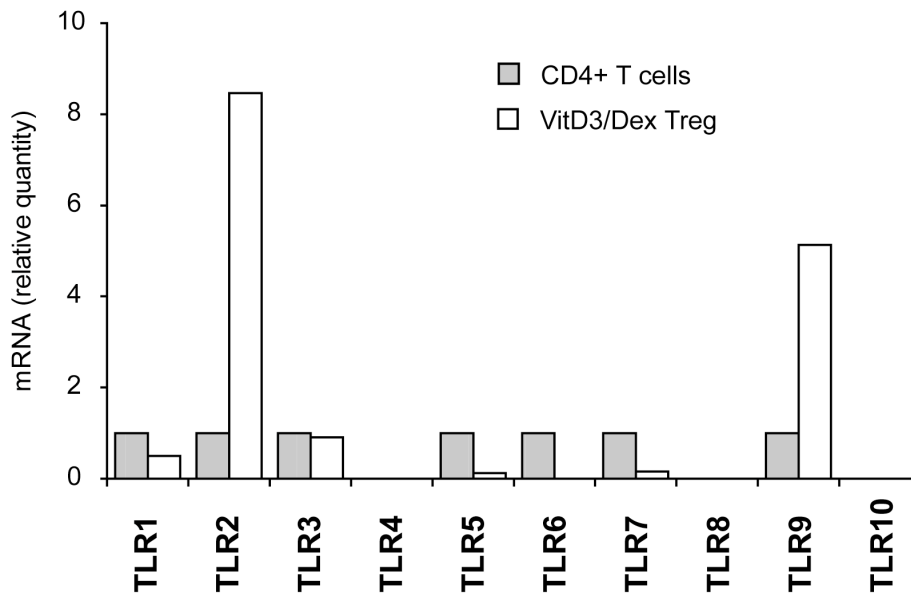

### Supplementary 1

#### TLR profile of CD4+ T cells in comparison with IL-10-Treg.

Freshly isolated CD4+ T cells and day 14 IL-10-Tregs (VitD3/Dex-Tregs) from the same donor were assessed for expression of TLR transcripts by Real time RT-PCR. Data are shown normalised to an endogenous control (18s rRNA) and expressed relative to day 0 CD4+ T cells. A representative experiment of a minimum of 4 performed using different healthy donors is shown.

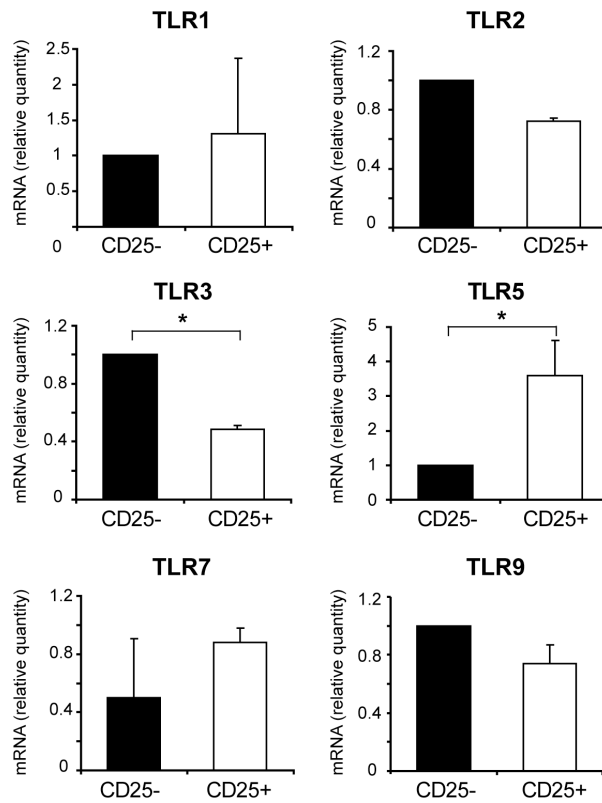

## Supplementary 2

### Complete TLR mRNA profile of human CD4+CD25+ Treg.

CD4+ CD25+/- T cells were isolated by cell sorting on the basis of high or negative expression of CD25, respectively. Purity of both populations was routinely >99%. The TLR expression profile was analysed by Real time RT-PCR. Data are shown normalised to an endogenous control (18s rRNA) and expressed relative to CD25- T cells. Mean data  $\pm$  SEM from 3 healthy donors are depicted. \*= $p < 0.05$ , as assessed by Mann Whitney rank sum test.

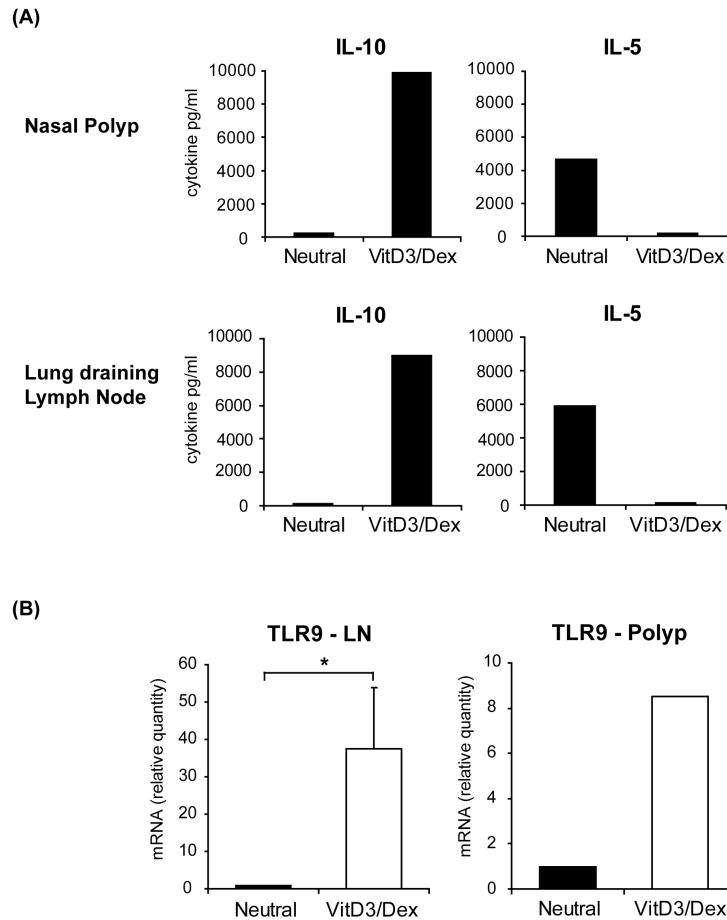

### Supplementary 3

#### Drug-induced IL-10-Treg can be induced from T cells derived from human respiratory tract tissue and express TLR9.

CD3+CD4+ T cells and CD3+ T cells were isolated from human lung draining lymph nodes and nasal polyps, respectively and then cultured for two 7-day cycles with anti-CD3, IL-2 and IL-4 alone (Neutral) or additionally with 1 $\alpha$ 25dihydroxyvitamin D3 (VitD3) and dexamethasone (Dex).

**(A)** Cells were re-stimulated for 48 hours with anti-CD3 and IL-2 alone and the supernatants were analysed for expression of IL-10 and IL-5 by ELISA. Data shown are representative of 3 independent experiments.

**(B)** Gene expression of TLR9 at day 14 as assessed by Real time RT-PCR. Data are shown normalised to an endogenous control (18s rRNA) and expressed relative to Neutral cells. Mean data  $\pm$  SEM from 3 lymph node (LN) samples are depicted. Data are representative of 2 independent nasal polyp experiments. \*= $p$ <0.05 as assessed by Mann Whitney rank sum test.

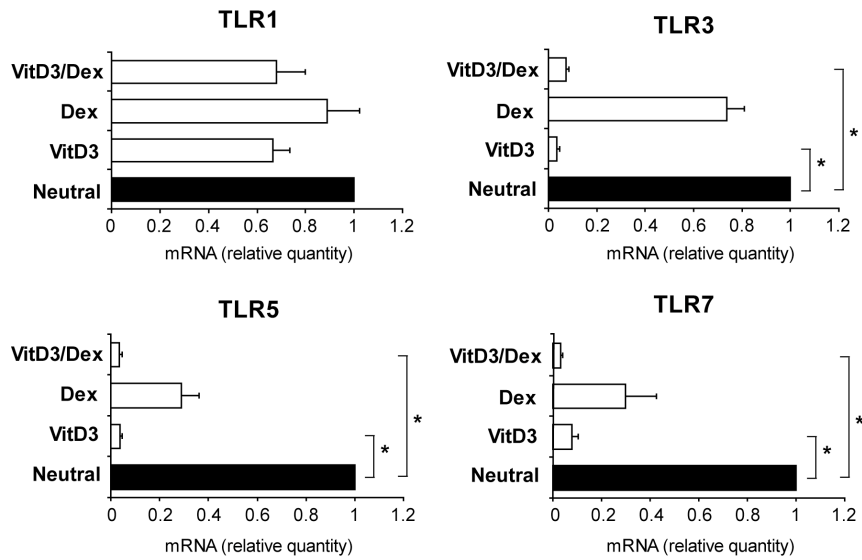

#### Supplementary 4

The effects of  $1\alpha,25$ -dihydroxyvitamin D<sub>3</sub> (VitD3) and dexamethasone (Dex), singly or in combination, on the expression of TLR by CD4<sup>+</sup> T cells at day 14, as examined by Real time RT-PCR. Data are shown normalised to an endogenous control (18s rRNA) and expressed relative to Neutral cells. Mean data  $\pm$  standard error of the mean from 5 healthy donors are presented. \*= $p < 0.05$  as assessed by One Way ANOVA on Ranks.
